# Supplementary material for: A new approach for the preparation of well-defined Rh and Pt nanoparticles stabilized by phosphine-functionalized silica for selective hydrogenation reactions
Source: Royal Society of Chemistry journal article supplement (doi:10.1039/c6cc10338c), 2017-01-01
Supplement: c6cc10338c1.pdf [file c6cc10338c1.pdf]

# Supporting Information

## **New approach for the preparation of Rh and Pt nanoparticles stabilized by phosphine functionalized silica for selective hydrogenation reactions.**

J. Llop Castelbou,<sup>a,b</sup> K. C. Szeto,<sup>b</sup> W. Barakat,<sup>b</sup> N. Merle,<sup>b</sup> C. Godard,<sup>a,c</sup> M. Taoufik<sup>b</sup> and C. Claver<sup>a,c</sup>

<sup>a</sup> Departament de Química Física i Inorgànica, Universitat Rovira i Virgili, C/ Marcel·li Domingo s/n, Campus Sescelades, 43007, Tarragona, Spain.

<sup>b</sup> C2P2, team COMS (CNRS-UMR 5265) Université Lyon 1, ESCPE Lyon 43 Boulevard du 11 Novembre 1918, 69626 Villeurbanne Cedex, France.

<sup>c</sup> Centre Tecnològic de la Química, C/Marcel·li Domingo s/n, Campus Sescelades, 43007 Tarragona, Spain

Table of Contents :

**S1. General conditions**

**S2. Synthesis and characterization of the supports**

**S3. Synthesis and characterization of the nanoparticles**

**S4. Catalytic tests**

## S1. General conditions

All experiments were carried out under inert atmosphere, either N<sub>2</sub> or Ar. Schlenk and glove-box techniques were used for the synthesis of the organometallic compounds. For the synthesis and treatment of the modified silica materials, a high- vacuum line (about 1 Pa) and a glove box were used. Diethyl ether and pentane were distilled on Na/K- benzophenone and degassed through freeze- pump- thaw cycles. RhCl<sub>3</sub>·xH<sub>2</sub>O and Pt(dba)<sub>3</sub> were purchased from Sigma Aldrich Company. Elemental analysis was performed at the Mikroanalytisches Labor Pascher, Remagen (Germany). DRIFT spectra were recorded on a Nicolet 6700 FTIR by using airtight cells. Solid- state <sup>1</sup>H MAS <sup>31</sup>P NMR and <sup>13</sup>C CP/MAS-NMR spectra were recorded on a Bruker Avance 500 spectrometer with a conventional double- resonance 4mm CO-MAS probe at the Laboratoire de Chimie Organométallique de Surface of the Ecole Supérieure de Chimie Physique Electronique of Lyon. The samples were loaded under argon atmosphere into a zirconia rotor, which was then tightly closed. Chemical shifts are given with respect to TMS as an external reference for the <sup>1</sup>H, <sup>13</sup>C and <sup>31</sup>P NMR data.

## S2. Synthesis and characterization of the supports

### Preparation of SiO<sub>2-700</sub> :

Silica Aerosil (Degussa) with a specific area of 200 m<sup>2</sup>g<sup>-1</sup> was calcined at 500 °C for 4h then dehydroxylated at 700°C for 12h under a high vacuum (10<sup>-5</sup> mmHg). The DRIFT spectrum features the characteristic isolated SiOH peak at 3747 cm<sup>-1</sup>.

### Preparation of [(≡SiO)<sub>2</sub>Al*i*Bu.(Et<sub>2</sub>O)]:

Using the double Schlenk technique, SiO<sub>2-700</sub> (3.9 g) was treated with 1.2 % excess [(Al*i*Bu<sub>3</sub>) (Et<sub>2</sub>O)] in diethylether (10 ml) for 2h at room temperature. After repeated washings with diethylether (10ml), followed by evacuation of the volatile under high vacuum (10<sup>-5</sup> mmHg), the modified silica was afforded as a white powder and characterized by DRIFT, solid- state NMR spectroscopy and mass- balance analysis.

The DRIFT spectrum features the characteristic stretching bands of C-H bond around 2800-3000 cm<sup>-1</sup>. Phase Gas analysis by GC: 0.87 *i*BuH/Al. Elemental analysis: % Al= 1.6, % C= 7.6, C/Al= 11.

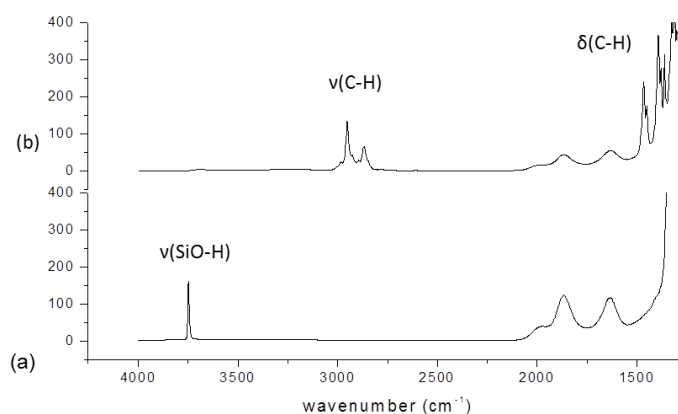

Figure 1 DRIFT spectroscopy of a) SiO<sub>2-700</sub> b) [(≡SiO)<sub>2</sub>Al*i*Bu.(Et<sub>2</sub>O)]

$^1\text{H}$  solid-state NMR (500Hz,  $\delta$  in ppm): -0.1 ( $\text{AlCH}_2\text{CH}(\text{CH}_3)_2$ ), 0.9 ( $\text{AlCH}_2\text{CH}(\text{CH}_3)_2$ ,  $\text{SiCH}_2\text{CH}(\text{CH}_3)_2$ ), 1.2 ( $\text{O}(\text{CH}_2\text{CH}_3)_2$ ), 1.8 ( $\text{MCH}_2\text{CH}(\text{CH}_3)_2$ ), 3.8 ( $\text{O}(\text{CH}_2\text{CH}_3)_2$ ).

$^{13}\text{C}$  CP-MAS solid-state NMR (500Hz,  $\delta$  in ppm): 14 ( $\text{O}(\text{CH}_2\text{CH}_3)_2$ ), 22 ( $\text{AlCH}_2\text{CH}(\text{CH}_3)_2$ ), 24-28 ( $\text{AlCH}_2\text{CH}(\text{CH}_3)_2$ ,  $\text{SiCH}_2\text{CH}(\text{CH}_3)_2$ ), 65 ( $\text{O}(\text{CH}_2\text{CH}_3)_2$ ).

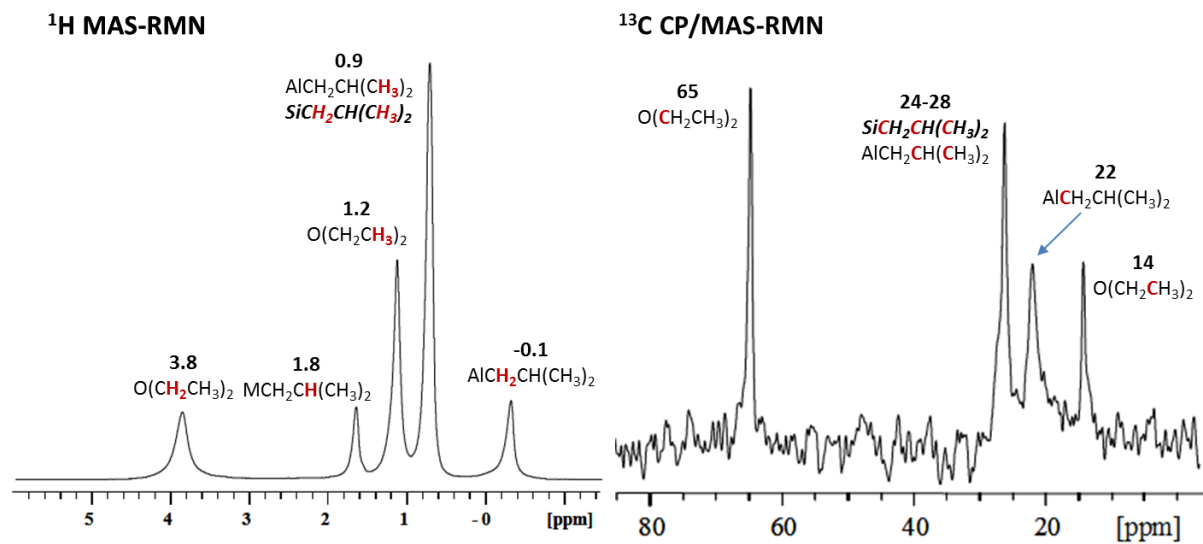

Figure 2  $^1\text{H}$  (left) and  $^{13}\text{C}$  (right) NMR of the  $[(\equiv\text{SiO})_2\text{AlBu} \cdot (\text{Et}_2\text{O})]$

### Preparation of the phosphine modified silica P-SiO<sub>2</sub>:

Using the double Schlenk technique, [(≡SiO)<sub>2</sub>Al*i*Bu.(Et<sub>2</sub>O)] (3 g) was treated with 1.2 % excess of 4-(diphenylphosphino)phenol (0.2296 g) in pentane (10 ml) for 2h at room temperature. After repeated washings with pentane (10 ml), followed by evacuation of the volatile under high vacuum (10<sup>-5</sup> mmHg), the modified silica was afforded as a white powder.

The DRIFT spectrum features the characteristic stretching bands for C-H bond around 2800-3000 cm<sup>-1</sup>, the stretching bands for C<sub>2p2</sub>-H above 3000 cm<sup>-1</sup> and for C=C around 1700- 1800 cm<sup>-1</sup>.

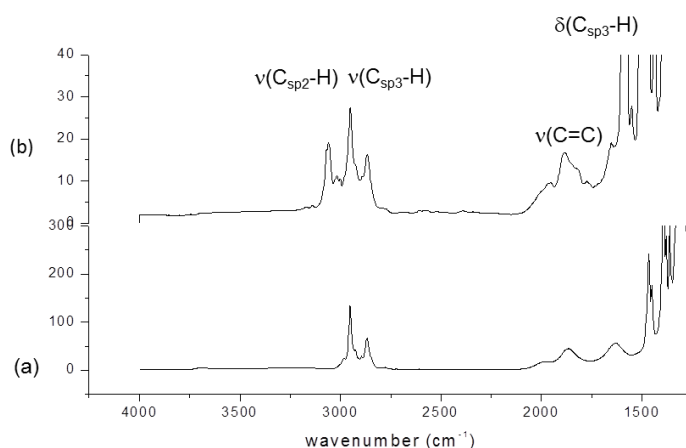

Figure 3 DRIFT spectroscopy of a) [(≡SiO)<sub>2</sub>Al*i*Bu.(Et<sub>2</sub>O)] b) P-SiO<sub>2</sub>

Phase gas analysis by GC: 0.87 *i*BuH/Al.

<sup>1</sup>H solid-state NMR (500Hz, δ in ppm): 0.8 (SiCH<sub>2</sub>CH(CH<sub>3</sub>)<sub>2</sub>), 4.1 (O(CH<sub>2</sub>CH<sub>3</sub>)<sub>2</sub>), 6.8 (Ar-H).

<sup>13</sup>C CP-MAS solid- state NMR (500Hz, δ in ppm): 12.69 (O(CH<sub>2</sub>CH<sub>3</sub>)<sub>2</sub>), 25.69 (AlCH<sub>2</sub>CH(CH<sub>3</sub>)<sub>2</sub>), 126.66-132.81 (Ar-C) .

<sup>31</sup>P CP-MAS solid-state NMR (500Hz, δ in ppm): (-6.18 P of P-SiO<sub>2</sub>).

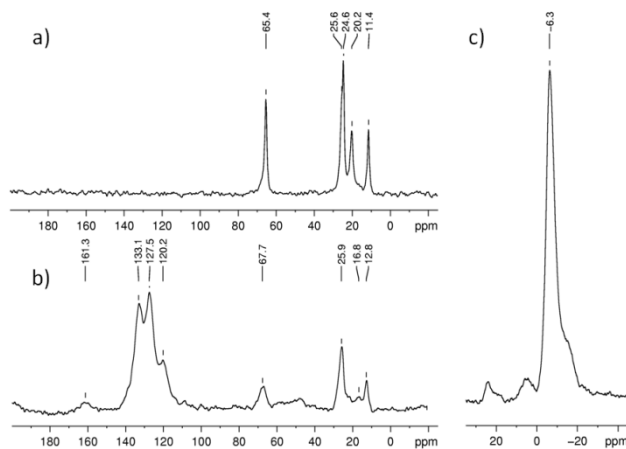

Figure 4 <sup>13</sup>C CP MAS NMR spectra of [(≡SiO)<sub>2</sub>Al*i*Bu.(Et<sub>2</sub>O)] (a) and P-SiO<sub>2</sub> (b) (125.7 MHz, 30000 scans, relaxation delay of 2s, CP contact time of 2ms, 10 kHz spinning speed) and <sup>31</sup>P CP MAS NMR spectrum of P-SiO<sub>2</sub> (c) (202.4 MHz, 6000 scans, relaxation delay of 2s, CP contact time of 2ms, 10 kHz spinning speed).

### S3. Synthesis and characterization of the nanoparticles

#### Preparation of the rhodium precursor

The synthesis was carried out according to the procedure described in the literature.<sup>1,2</sup> Allylmagnesium bromide (35 mmol) was added to a cold suspension (-10 °C) of  $\text{RhCl}_3 \cdot 3\text{H}_2\text{O}$  (1.1 g, 5.3 mmol) in THF (93 ml). The solution slowly lost its red-brown color to become yellow. The solution was then allowed to warm to room temperature and stirred for an additional 16 hours at 0 °C. The solvent was removed under reduced pressure and the residue extracted with pentane (previously distilled and deoxygenated) (3x20mL). The sublimation was carried out in a water bath at 40 °C and of yellow crystals formed onto the cold finger were collected. (Yield= 520 mg, 55 %)

The purity of this complex was checked by  $^1\text{H}$  and  $^{13}\text{C}$  NMR spectroscopy.<sup>3</sup>

#### Preparation of the soluble rhodium nanoparticles Rh-NPs

The synthesis of the Rh nanoparticles was carried out following the method reported by Chaudret and co-workers.<sup>4</sup> In a typical procedure, the  $[\text{Rh}(\eta^3\text{-C}_3\text{H}_5)_3]$  (64 mg, 0,28 mmol) was placed into a Fischer-Porter reactor and dissolved at -110 °C (acetone/  $\text{N}_2$  bath) in 64 mL of dry and deoxygenated THF (using freeze-pump-thaw techniques) in the presence of 0.4 equivalents of the  $\text{PPh}_3$  ligand. The Fischer-Porter reactor was then pressurized under 6 bar of  $\text{H}_2$  and stirred for 30 minutes at room temperature. The solution was then heated to 40 °C and stirred at this temperature during 24h. The initial colorless solution became black after 1h. A small amount (5 drops approx.) of the solution was deposited under an argon atmosphere on a carbon-covered copper grid for transmission electron microscopy analysis. The rest of the solution was concentrated under reduced pressure. Precipitation and washing with pentane (3 x 15 ml) was then carried out, obtaining a black precipitate. (Yield= ca. 25-30 mg, 30-35 %)

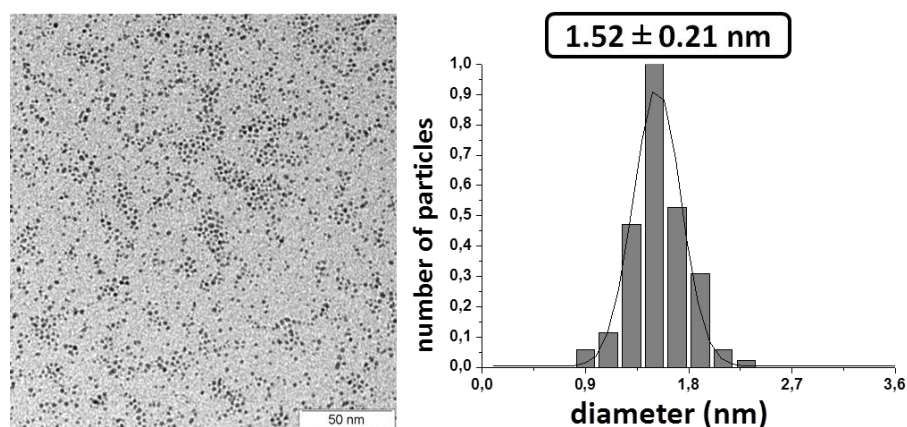

Figure 5 TEM micrograph and size distribution of the Rh- NPs

### Preparation of the NPs@SiO<sub>2</sub> without extra phosphine as stabilizer.

0.125 g of P-SiO<sub>2</sub> was reacted with (50.34 mg) of Pt(dba)<sub>3</sub> in 50 ml of degassed THF for 12 h at 25°C under 3 bar of H<sub>2</sub>. After evaporation of THF, the powder was washed three times with pentane. The resulting black powder was dried under vacuum and stored in the glove box.

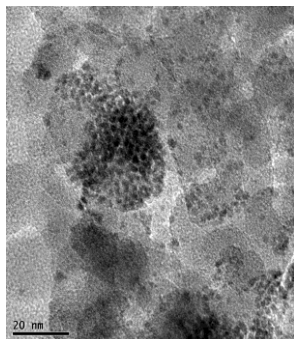

**Figure 6:** TEM Analysis of platinum nanoparticles grafted on silica <sub>700</sub>

The desired amount of the previously synthesized phosphine modified silica (250mg) and 29 mg of the [Rh( $\eta^3$ -(C<sub>3</sub>H<sub>5</sub>)<sub>3</sub>)] were placed in 30 ml of dry and deoxygenated THF (using freeze-pump-thaw techniques). The Fischer-Porter reactor was then pressurized under 4 bar of H<sub>2</sub> and the solution was heated to 40°C overnight. The solution turned black after a few hours. A carbon-covered copper grid for transmission electron microscopy was prepared with a small amount (5 drops approx.) under argon atmosphere. The solution was concentrated under reduced pressure.

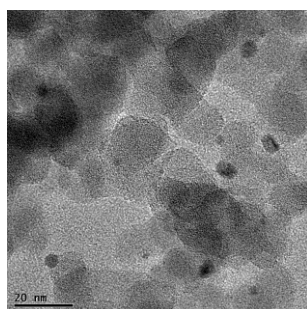

**Figure 1:** TEM Analysis of rhodium nanoparticles grafted on silica <sub>700</sub>

### Preparation of the rhodium nanoparticles Rh-NPs@SiO<sub>2</sub> with extra phosphine as stabilizer.

The silica previously dehydroxylated at 700 °C (SiO<sub>2-700</sub>) (500mg), 62,5 mg of the [Rh( $\eta^3$ -C<sub>3</sub>H<sub>5</sub>)<sub>3</sub>] and 27,5 mg of triphenylphosphine, were placed in 60 ml of dry and deoxygenated THF (using freeze-pump-thaw techniques). The Fischer-Porter reactor was then pressurized under 4 bar of H<sub>2</sub> and the solution was heated to 40°C overnight. The solution turned black after a few hours. A carbon-covered copper grid for transmission electron microscopy was prepared with a small amount (5 drops approx.) under argon atmosphere. The solution was concentrated under reduced pressure. The black powder was characterized by:

TEM: Nanoparticles of  $2.55 \pm 0.42$  nm of mean diameter.

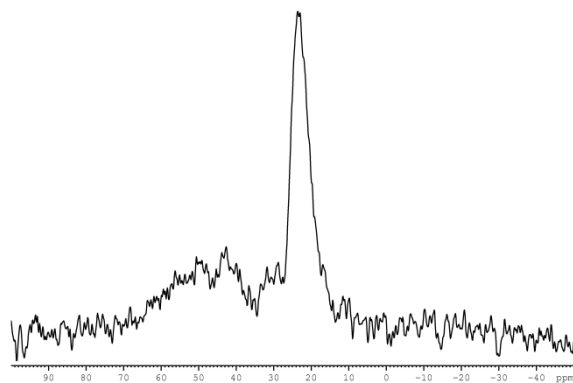

Figure 8 31 P SS NMR of Rh-NPs@SiO<sub>2</sub>

### Preparation of the platinum nanoparticles Pt-NPs@SiO<sub>2</sub> with extra phosphine as stabilizer.

400 mg of SiO<sub>2</sub>-700 was reacted with (50.34 mg) of Pt(dba)<sub>3</sub> and 12 mg of PPh<sub>3</sub> (0.4 eq) in 100 ml of degassed THF for 12h at 25 °C under 3 bar of H<sub>2</sub>. After evaporation of THF, the powder was washed three times with pentane. The resulting black powder was dried under vacuum and stored in the glove box .

TEM: Nanoparticles of 1.60 ± 0.40 nm of mean diameter.

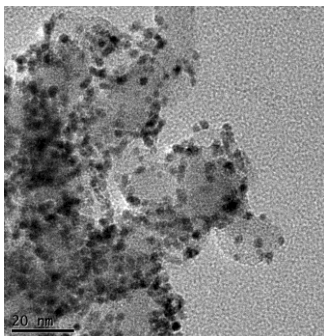

**Figure 9:** TEM Analysis of platinum nanoparticles Pt-NPs@SiO<sub>2</sub> grafted on silica<sub>700</sub> stabilized by PPh<sub>3</sub>

### Preparation of the rhodium nanoparticles Rh-NPs@P-SiO<sub>2</sub>

The desired amount of the previously synthesized phosphine modified silica (500mg), 62,5 mg of the [Rh(η<sup>3</sup>-(C<sub>3</sub>H<sub>5</sub>)<sub>3</sub>)] and 27,5 mg of triphenylphosphine, were placed in 60 ml of dry and deoxygenated THF (using freeze-pump-thaw techniques). The Fischer-Porter reactor was then pressurized under 4 bar of H<sub>2</sub> and the solution was heated to 40°C overnight. The solution turned black after a few hours. A carbon-covered copper grid for transmission electron microscopy was prepared with a small amount (5 drops approx.) under argon atmosphere. The solution was concentrated under reduced pressure. The black powder was characterized by:

Elemental analysis: % P: 1.27 % Rh: 4.36

TEM: Nanoparticles of 1.17 ± 0.18 nm of mean diameter, distributed only onto the support.

<sup>31</sup>P CP-MAS solid-state NMR (500Hz): δ (21, 26, 42 ppm).

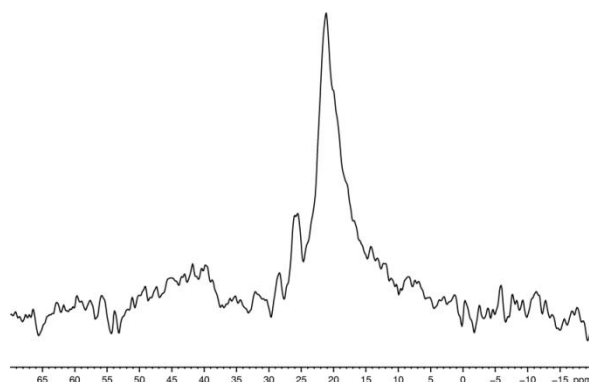

**Figure 10** <sup>31</sup>P SS NMR of Rh-NPs@P-SiO<sub>2</sub>



### Preparation of the platinum nanoparticles Pt-NPs@P-SiO<sub>2</sub>

400 mg of P-SiO<sub>2</sub> was reacted with 50.34 mg of commercial from Sigma-Aldrich Pt(dba)<sub>3</sub> and 12 mg of PPh<sub>3</sub> (0.4 eq) in 100 ml of degassed THF for 12h at 25 °C under 3 bar of H<sub>2</sub>. A small amount (5 drops approx.) of the solution was deposited under argon atmosphere on a carbon-covered copper grid for transmission electron microscopy analysis. The rest of the solution was concentrated under reduced pressure. Precipitation and washing with pentane (3 x 15 ml) was then carried out, obtaining a grey precipitate. The solution was dried over vacuum to obtain a crystalline black powder.

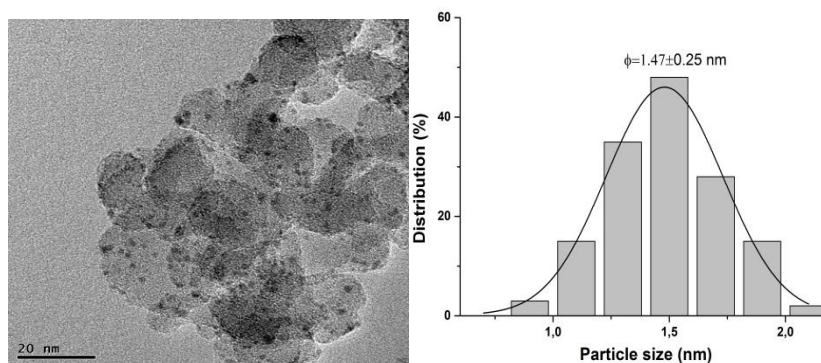

Figure 11 TEM micrograph and size distribution of platinum nanoparticles Pt-NPs@P-SiO<sub>2</sub>.

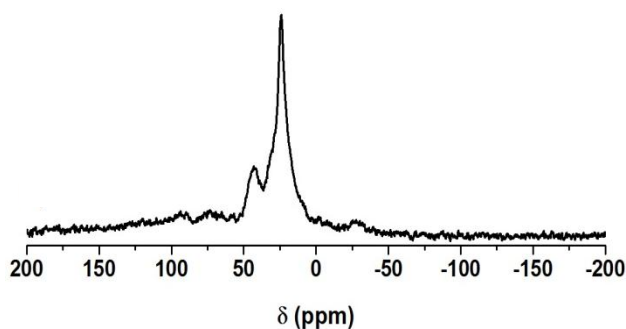

Figure 12 <sup>31</sup>P SS NMR of Pt-NPs@P-SiO<sub>2</sub>

### S4. Catalytic tests

Hydrogenation reactions were performed by autoclave using heptane as a solvent for 4h under 40 bar at 80 °C. Aromatic products were analyzed in line by GC (HP 5890 chromatograph fitted with HP-5 30 m x 0.32 mm x 0.25µm capillary column, FID detector) and GC-MS (HP 6890 chromatograph / 59975C mass selective instrument fitted with HP-5 30 m x 0.25 mm x 0.25µm capillary column and chem station software).

---

<sup>1</sup> M. D. Fryzuk, W. E. Piers in *Organometallic Syntheses* (Eds.: R. B. King, J. J. Eisch), Elsevier, Amsterdam, **1986**, vol. 3, p.128.

<sup>2</sup> W. A. Herrmann in *Synthetic Methods of Organometallic and Inorganic Chemistry* (Ed.: W. A. Herrmann), Thieme, Stuttgart, **1996**, p. 38.

<sup>3</sup> K. D. John, K. V. Salazar, B. L. Scott, R. T. Baker, A. P. Sattelberger, *Organometallics*, **2001**, *20*, 296-304.

<sup>4</sup> J. García-Antón, M. R. Axet, S. Jansat, K. Philippot, B. Chaudret, T. Pery, G. Buntkowsky, H.-H. Limbach *Angew. Chem. Int. Ed.* **2008**, *47*, 2074-2078.
